# Supplementary material
Source: PubMed Central journal article supplement (PMC4112178)

# Supplementary Figure 1

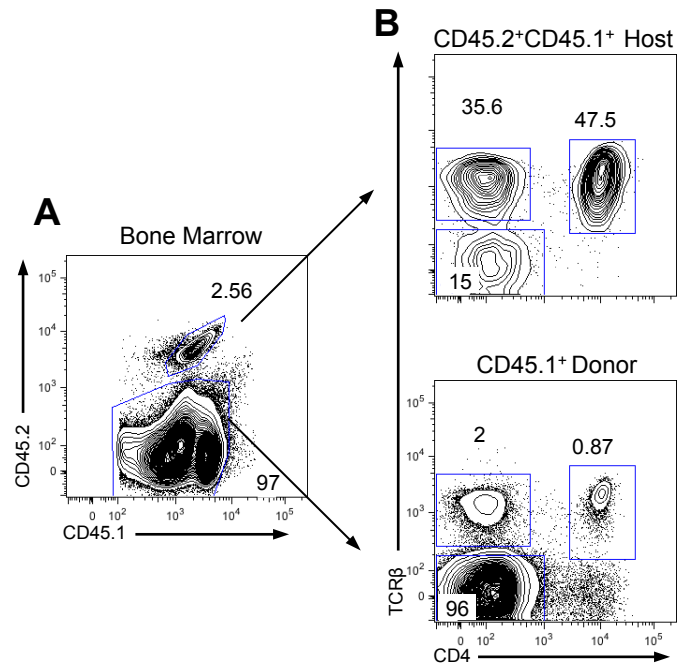

Supplement: NIHMS550293-supplement-1.pdf [file NIHMS550293-supplement-1.pdf]

# Supplementary figure 2

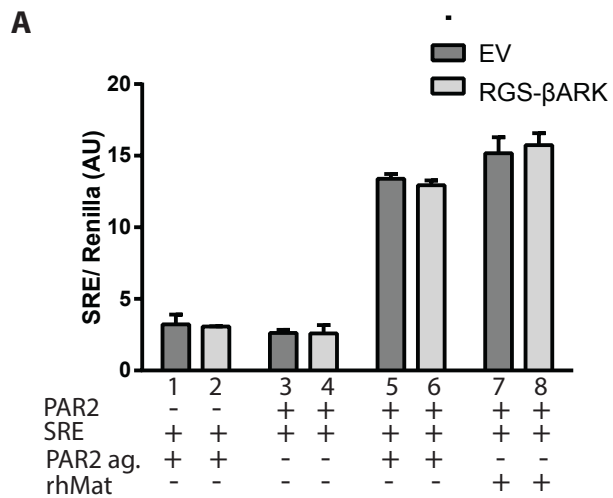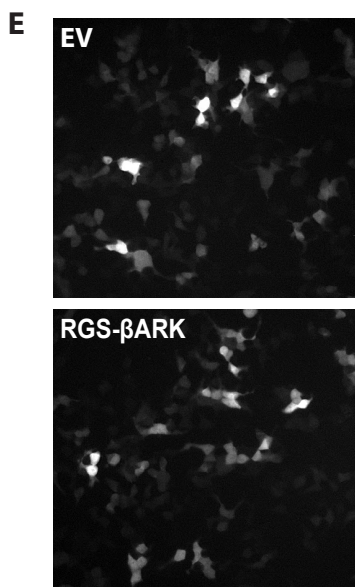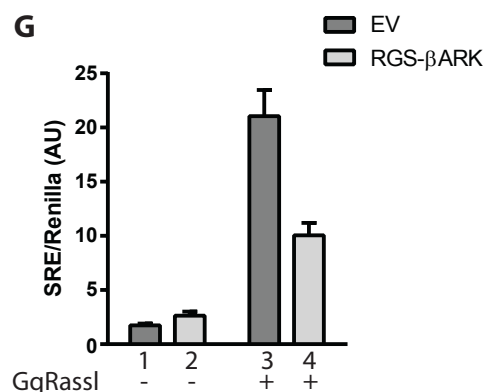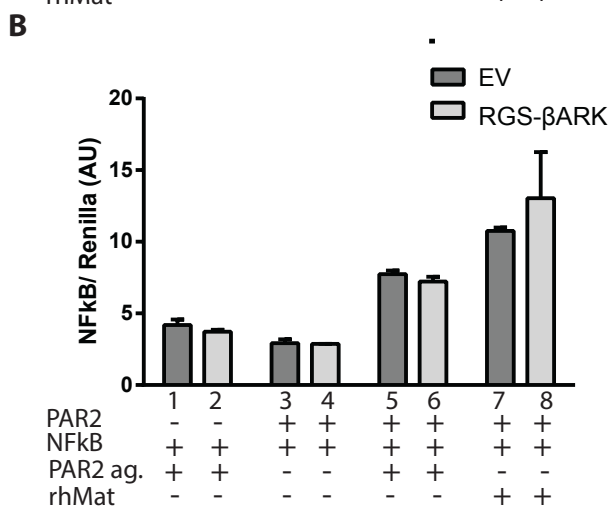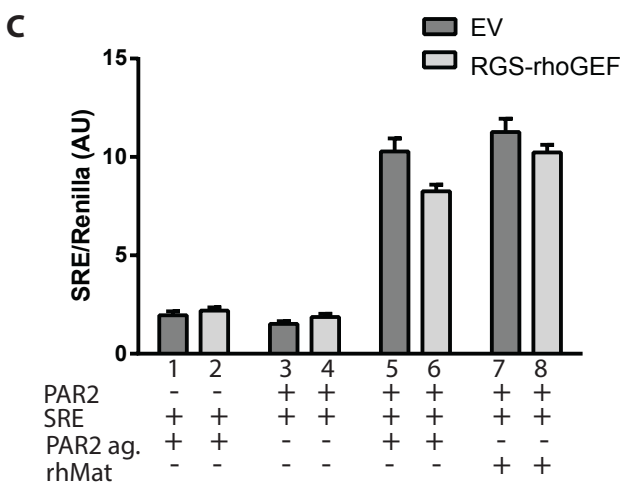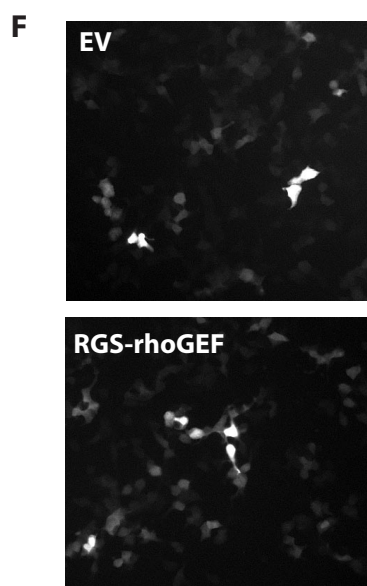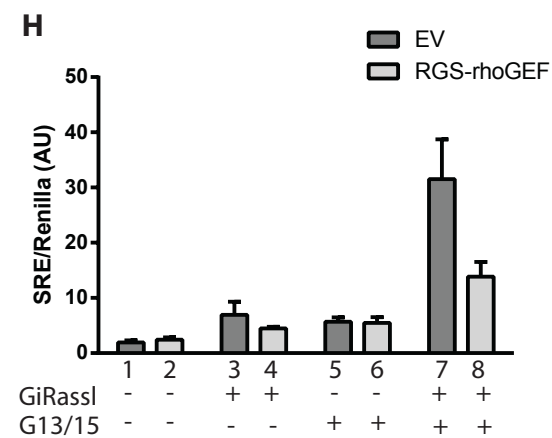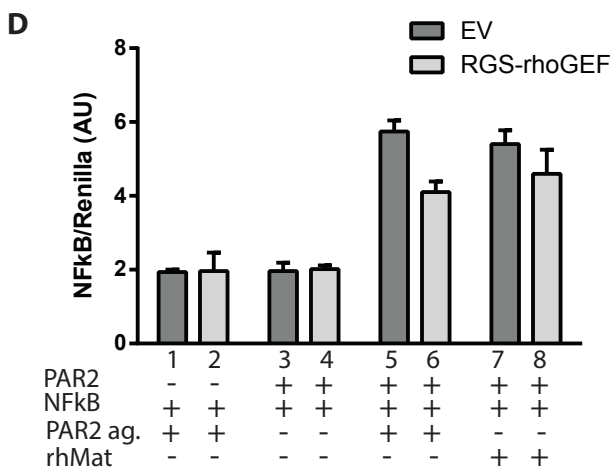

Supplement: NIHMS550293-supplement-2.pdf [file NIHMS550293-supplement-2.pdf]

# Supplementary Figure 3

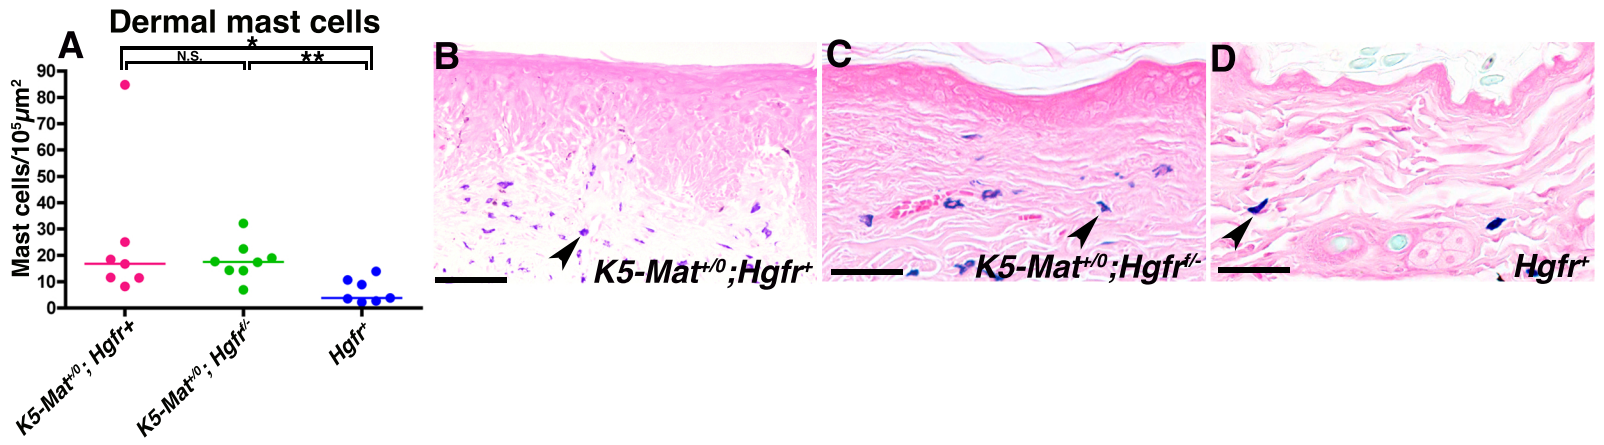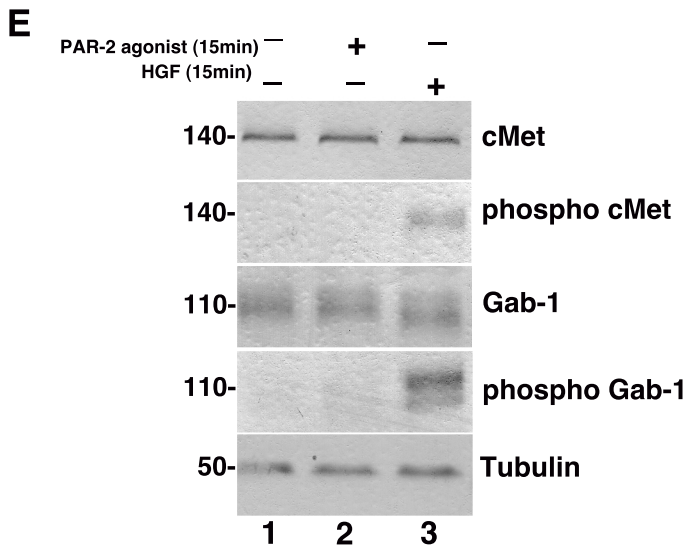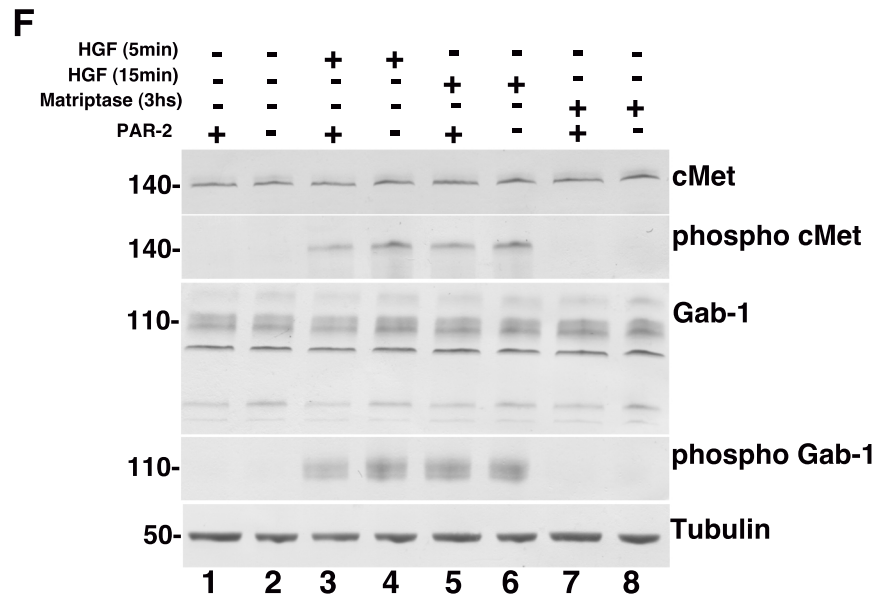

Supplement: NIHMS550293-supplement-3.pdf [file NIHMS550293-supplement-3.pdf]
